# Supplementary material for: Functional Profiling Discovers the Dieldrin Organochlorinated Pesticide Affects Leucine Availability in Yeast
Source: PubMed Central journal article supplement — Toxicol Sci. 2013 Jan 28;132(2):347–58. doi: 10.1093/toxsci/kft018 (PMC3595527; doi:10.1093/toxsci/kft018), 2013-01-28
Supplement: supp_kft018_toxsci_12_0972_File011.pdf [file supp_kft018_toxsci_12_0972_File011.pdf]

| Strain                                     | Description of deleted gene                                        | dieldrin IC30<br>(690 $\mu$ M) |       | p-value<br>to WT | dieldrin IC30<br>(690 $\mu$ M) +<br>5mM leucine |       | p-value<br>to no<br>leucine | Human<br>homolog<br>of deleted<br>gene |
|--------------------------------------------|--------------------------------------------------------------------|--------------------------------|-------|------------------|-------------------------------------------------|-------|-----------------------------|----------------------------------------|
|                                            |                                                                    | Ratio                          | SEM   |                  | Ratio                                           | SEM   |                             |                                        |
| <i>Kinases and phosphatases</i>            |                                                                    |                                |       |                  |                                                 |       |                             |                                        |
| <b>oca1<math>\Delta</math></b>             | Tyrosine phosphatase                                               | <b>0.389</b>                   | 0.043 | ***              | <b>0.884</b>                                    | 0.042 | **                          |                                        |
| <b>ssk2<math>\Delta</math></b>             | MAPKKK of the HOG1 mitogen-activated signaling pathway             | <b>0.787</b>                   | 0.007 | ***              | <b>0.949</b>                                    | 0.016 | ***                         | MAP3K4                                 |
| <b>ssk1<math>\Delta</math></b>             | Cytoplasmic response regulator                                     | <b>0.854</b>                   | 0.014 | ***              | <b>0.990</b>                                    | 0.037 | *                           |                                        |
| <b>cka1<math>\Delta</math></b>             | Alpha catalytic subunit of casein kinase 2                         | <b>0.888</b>                   | 0.004 | ***              | ND                                              | ND    | NA                          | CSNK2A1                                |
| <b>gcn2<math>\Delta</math></b>             | Protein kinase; initiates starvation response                      | <b>0.907</b>                   | 0.054 | NS               | <b>1.203</b>                                    | 0.046 | *                           | EIF2AK4                                |
| <b>ptc6<math>\Delta</math></b>             | Mitochondrial type 2C protein phosphatase                          | <b>0.909</b>                   | 0.021 | **               | ND                                              | ND    | NA                          | PPM1K                                  |
| <i>Downstream of Tor</i>                   |                                                                    |                                |       |                  |                                                 |       |                             |                                        |
| <b>sap155<math>\Delta</math></b>           | Required for function of the Sit4p protein phosphatase             | <b>0.927</b>                   | 0.022 | *                | <b>0.915</b>                                    | 0.027 | NS                          | PPP6R1                                 |
| <b>sit4<math>\Delta</math></b>             | Type 2A-related serine-threonine phosphatase                       | <b>0.957</b>                   | 0.020 | NS               | <b>0.957</b>                                    | 0.022 | NS                          | PPP6                                   |
| <b>sap4<math>\Delta</math></b>             | Required for function of the Sit4p protein phosphatase             | <b>1.036</b>                   | 0.017 | NS               | <b>1.007</b>                                    | 0.019 | NS                          |                                        |
| <i>Transcription activators/repressors</i> |                                                                    |                                |       |                  |                                                 |       |                             |                                        |
| <b>imp2<math>\Delta</math></b>             | Transcriptional activator; maintains ion homeostasis               | <b>0.373</b>                   | 0.091 | **               | ND                                              | ND    | NA                          |                                        |
| <b>spt8<math>\Delta</math></b>             | Subunit of the SAGA transcriptional regulatory complex             | <b>0.470</b>                   | 0.016 | ***              | <b>0.825</b>                                    | 0.017 | ***                         |                                        |
| <b>mot3<math>\Delta</math></b>             | Transcriptional repressor                                          | <b>0.633</b>                   | 0.015 | ***              | ND                                              | ND    | NA                          |                                        |
| <b>gat1<math>\Delta</math></b>             | Transcriptional activator for nitrogen catabolite repression genes | <b>1.027</b>                   | 0.013 | NS               | 0.9833                                          | 0.019 | NS                          |                                        |
| <i>Autophagy (48H treatment)</i>           |                                                                    |                                |       |                  |                                                 |       |                             |                                        |
| <b>atg13<math>\Delta</math></b>            | Required for vesicle formation during autophagy                    | <b>0.933</b>                   | 0.023 | *                | <b>0.947</b>                                    | 0.026 | NS                          | ATG13                                  |
| <b>atg12<math>\Delta</math></b>            | Ubiquitin-like modifier involved in autophagy and Cvt pathway      | <b>0.993</b>                   | 0.015 | NS               | <b>1.023</b>                                    | 0.034 | NS                          | APG12                                  |
| <b>atg5<math>\Delta</math></b>             | Involved in autophagy and the Cvt pathway                          | <b>1.010</b>                   | 0.012 | NS               | <b>0.987</b>                                    | 0.023 | NS                          | ATG5                                   |
| <i>Other</i>                               |                                                                    |                                |       |                  |                                                 |       |                             |                                        |
| <b>pdr5<math>\Delta</math></b>             | Multidrug transporter                                              | <b>0.314</b>                   | 0.040 | ***              | <b>0.486</b>                                    | 0.037 | *                           | ABCG2                                  |
| <b>opi3<math>\Delta</math></b>             | Phospholipid methyltransferase                                     | <b>0.711</b>                   | 0.045 | **               | ND                                              | ND    | NA                          | PEMT                                   |
| <b>bre5<math>\Delta</math></b>             | Ubiquitin protease cofactor                                        | <b>0.714</b>                   | 0.030 | ***              | ND                                              | ND    | NA                          |                                        |
| <b>ufd2<math>\Delta</math></b>             | Ubiquitin chain assembly factor (E4)                               | <b>0.746</b>                   | 0.061 | *                | ND                                              | ND    | NA                          | UBE4B                                  |
| <b>yen1<math>\Delta</math></b>             | Holliday junction resolvase                                        | <b>0.754</b>                   | 0.027 | ***              | ND                                              | ND    | NA                          | GEN1                                   |
| <b>sac3<math>\Delta</math></b>             | Nuclear pore-associated protein                                    | <b>0.757</b>                   | 0.035 | **               | ND                                              | ND    | NA                          | MCM3AP                                 |
| <b>tim18<math>\Delta</math></b>            | Component of the mitochondrial TIM22 complex                       | <b>0.775</b>                   | 0.024 | ***              | ND                                              | ND    | NA                          |                                        |
| <b>par32<math>\Delta</math></b>            | Unknown function; phosphorylated upon rapamycin treatment          | <b>0.787</b>                   | 0.062 | *                | ND                                              | ND    | NA                          |                                        |
| <b>cnb1<math>\Delta</math></b>             | Calcineurin B; the regulatory subunit of calcineurin               | <b>0.913</b>                   | 0.008 | **               | <b>0.908</b>                                    | 0.016 | NS                          | PPP3R1                                 |
| <b>thi3<math>\Delta</math></b>             | Role in branched chain amino acid degradation                      | <b>0.941</b>                   | 0.014 | **               | ND                                              | ND    | NA                          | HACL1                                  |
| <b>pda1<math>\Delta</math></b>             | E1 alpha subunit of the pyruvate dehydrogenase complex             | <b>0.969</b>                   | 0.028 | NS               | ND                                              | ND    | NA                          | PDHA1                                  |

**Table S2.** Confirming dieldrin sensitivity for various strains by flow cytometry. A list of strains not shown in the main text that were tested for sensitivity to dieldrin. Ratios are defined as relative growth to a wild-type GFP strain between treated and control cultures. Statistically significant differences between wild-type and mutant strains as well as non-leucine and leucine treated strains were determined by Student's t-test, where \*\*\*= $p < 0.001$ , \*\*= $p < 0.01$ , and \*= $p < 0.05$ . ND=not determined, NA=not applicable, NS=not significant.

Gaytán *et al.* Functional profiling discovers that the dieldrin organochlorinated pesticide affects leucine availability in yeast.
