# Supplementary material for: Functional Profiling Discovers the Dieldrin Organochlorinated Pesticide Affects Leucine Availability in Yeast
Source: PubMed Central journal article supplement — Toxicol Sci. 2013 Jan 28;132(2):347–58. doi: 10.1093/toxsci/kft018 (PMC3595527; doi:10.1093/toxsci/kft018), 2013-01-28
Supplement: supp_kft018_toxsci_12_0972_File012.pdf [file supp_kft018_toxsci_12_0972_File012.pdf]

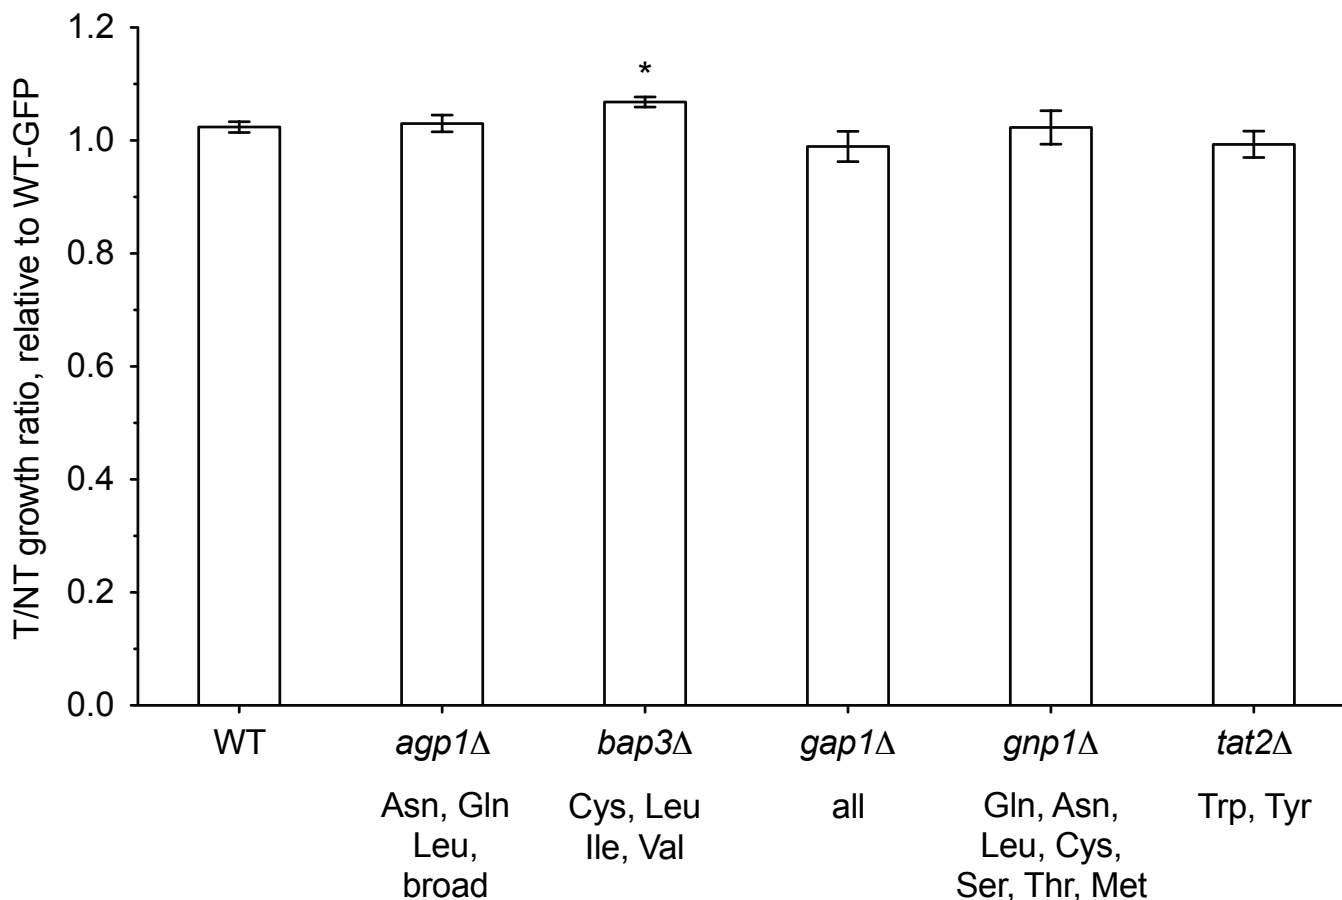

**Figure S1. Mutants lacking amino acid transporters other than Bap2p are not sensitive to dieldrin.** Relative growth ratios (treatment versus control) to a GFP-expressing wild-type strain were obtained for three independent YPD cultures exposed to the dieldrin IC25 (690  $\mu$ M), for which the means and standard errors are shown. Amino acids reported to be transported by the missing protein are indicated below the strain. Statistically significant differences between the wild-type and mutant strains were determined with Student's t-test, where  $*=p<0.05$ .

Gaytán *et al.* Functional profiling discovers that the dieldrin organochlorinated pesticide affects leucine availability in yeast.
